# Supplementary material for: Differential effects of Cytomegalovirus carriage on the immune phenotype of middle-aged males and females
Source: PubMed Central journal article supplement (PMC4886678; doi:10.1038/srep26892), 2016-05-31
Supplement: srep26892-s1.pdf [file srep26892-s1.pdf]

## **Supplementary information**

### **Differential effects of Cytomegalovirus carriage on the immune phenotype of middle-aged males and females.**

Marieke van der Heiden<sup>1,2</sup>, Menno C. van Zelm<sup>3,4</sup>, Sophinus J.W. Bartol<sup>3</sup>, Lia G.H. de Rond<sup>1</sup>, Guy A.M. Berbers<sup>1</sup>, Annemieke M.H. Boots<sup>2</sup>, Anne-Marie Buisman<sup>1</sup>

Supplementary Figures

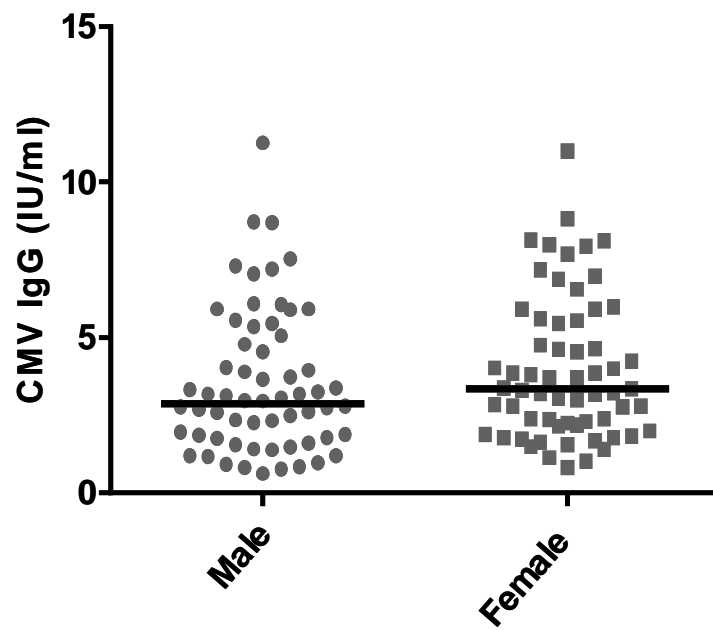

**Supplementary Figure 1. The CMV IgG titers in males and females**

The geometric mean is shown. The Mann Whitney U test was used for statistical analysis (n=123).

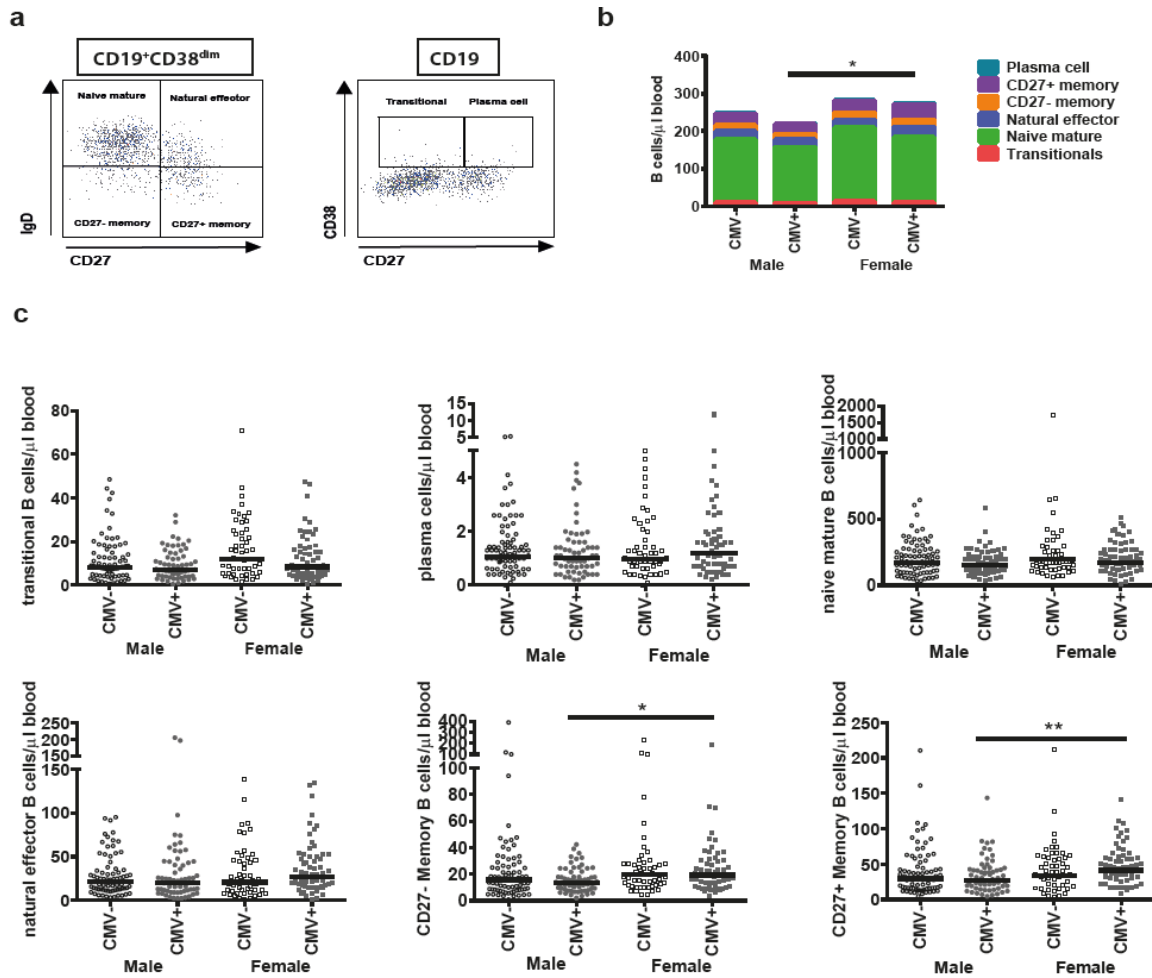

**Supplementary figure 2. The combined effects of gender and CMV on the absolute numbers of B cell subsets**

**a)** Gating strategy of the different B cell subsets. A representative sample is shown. **b)** A cumulative schematic overview of the geometric mean values of absolute numbers of different B cell subsets. **c)** Absolute numbers of transitional, plasma, naive mature, natural effector, CD27- memory, and CD27+ memory B cells in the four groups. The Geometric mean is indicated in the graphs, and the Kruskal - Wallis test was used for statistical analysis, \*  $p < 0.05$ , \*\*  $p < 0.01$  after Bonferroni correction ( $n = 250$ ).

**a**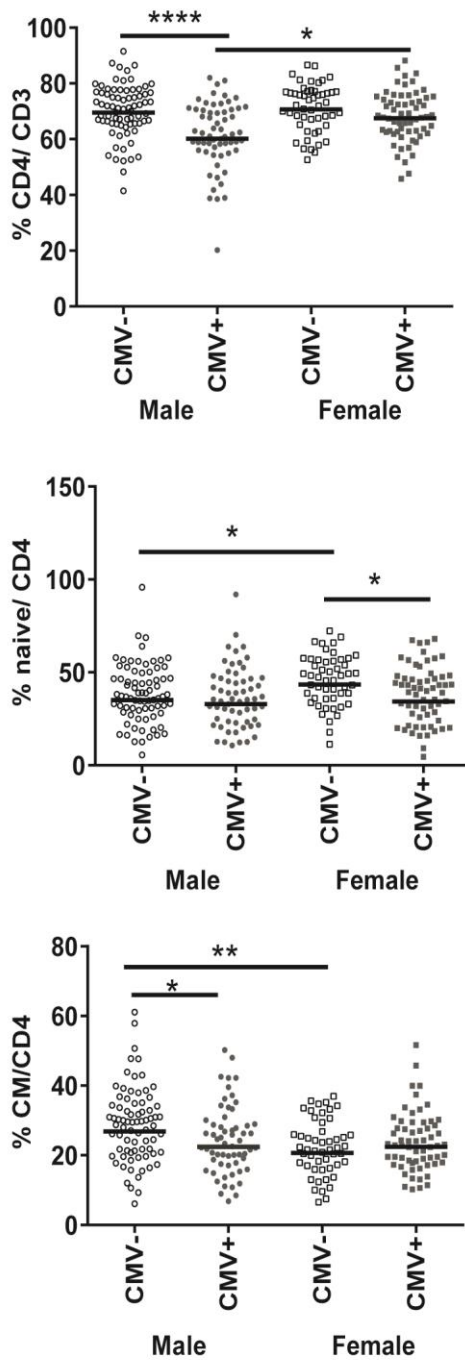**b**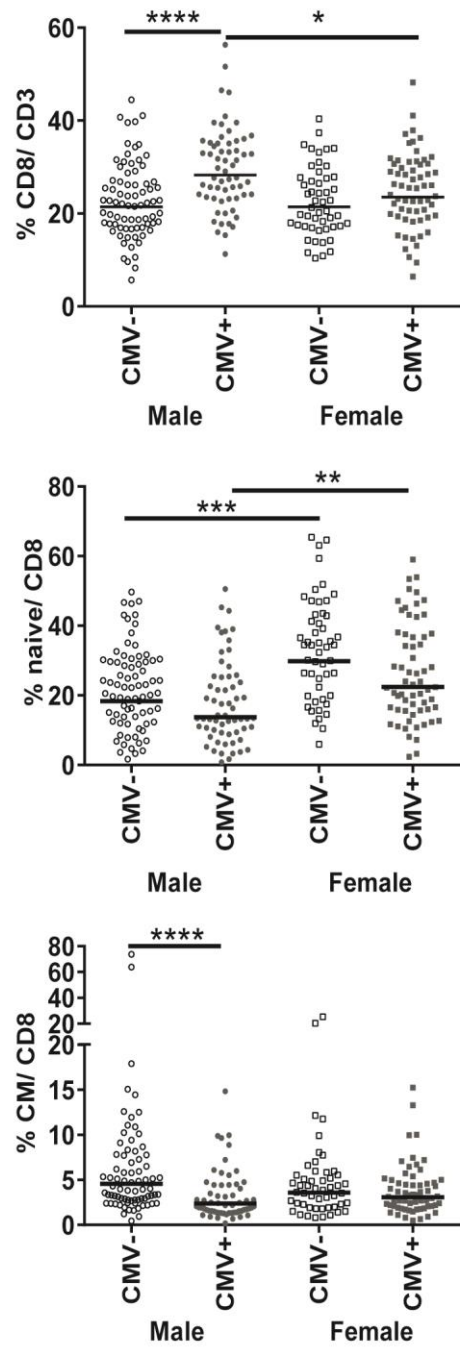

### Supplementary figure 3. The relative numbers of total CD4, CD8, naive and CM T-cells

**a)** The relative proportion of total CD4, naive CD4, and CM CD4 T-cells within the total CD3+ T-cell population.

**b)** The relative proportion of total CD8, naive CD8, and CM CD8 T-cells within the total CD3+ T-cell population.

The Geometric mean is indicated in the graphs, and the Kruskal-Wallis test was used for statistical analysis. \* p<0.05, \*\* p<0.01, \*\*\* p<0.001, \*\*\*\* p<0.0001 after Bonferroni correction (n=250).

**Supplementary Table 1. General health status of the study cohort (n = 255), separated by gender and CMV status.**

# medication used more than 3 months ago. a. CMV- male vs CMV- female, b. CMV+ male vs CMV+ female, c. CMV- female vs CMV+ female. \*p<0.05, \*\*p<0.01, \*\*\*p<0.001, \*\*\*\*p<0.0001. Bold numbers indicate significant differences within one measurement. After correction for multiple testing only values with p<0.0014 are considered significant. Significant differences are underlined. The Chi Square test was used to determine significant differences in frequencies between the groups. Biochemical parameters were compared with the Kruskal-Wallis test (adjusted for multiple comparisons).

|                                          | CMV+ male       | CMV- male       | CMV+ female                   | CMV- female                   |
|------------------------------------------|-----------------|-----------------|-------------------------------|-------------------------------|
| <b>Diseases in last year (number)</b>    |                 |                 |                               |                               |
| Diabetes type II                         | 4               | 6               | 2                             | <b>0</b> <sup>*a</sup>        |
| High blood pressure                      | 5               | 9               | <b>14</b> <sup>*b</sup>       | 7                             |
| Vascular diseases                        | 1               | 4               | 2                             | 2                             |
| Lung diseases                            | 2               | 4               | 3                             | 0                             |
| Rheumatic diseases                       | 2               | 2               | 0                             | 0                             |
| Gastro-intestinal diseases               | 1               | 3               | 1                             | 0                             |
| Liver diseases                           | 0               | 0               | 0                             | 0                             |
| Other diseases                           | 3               | 4               | 5                             | 2                             |
| No serious diseases                      | 49              | 56              | <b>38</b> <sup>*b</sup>       | 39                            |
| <b>Medication last 6 months (number)</b> |                 |                 |                               |                               |
| Medication for infections #              | 4               | 5               | 8                             | 3                             |
| Cholesterol lowering medication          | 6               | 10              | 12                            | 4                             |
| Diabetic medication                      | 2               | 5               | 1                             | 0                             |
| Blood pressure lowering medication       | 7               | 18              | 15                            | 8                             |
| Immunosuppressive medication #           | 1               | 1               | 2                             | 0                             |
| No medication                            | 47              | 54              | <b>33</b> <sup>**b/ **c</sup> | 39                            |
| <b>Infections (number)</b>               |                 |                 |                               |                               |
| Influenza <4 weeks                       | 2               | 3               | 3                             | 2                             |
| Cold <4 weeks                            | 14              | 13              | 7                             | 6                             |
| No infection <4 weeks                    | 45              | 63              | 53                            | 41                            |
| <b>Smoking (number)</b>                  |                 |                 |                               |                               |
| Cigarette smoking                        | 9               | 10              | 7                             | 7                             |
| Cigars, pipe smoking                     | 2               | 4               | 2                             | 1                             |
| None smoking                             | 49              | 63              | 53                            | 42                            |
| <b>Physical activity (numbers)</b>       |                 |                 |                               |                               |
| Weekly or more                           | 42              | 51              | 42                            | 36                            |
| Less than weekly                         | 7               | 10              | 10                            | 4                             |
| No activity                              | 11              | 17              | 10                            | 9                             |
| <b>Biochemical parameters</b>            |                 |                 |                               |                               |
| CRP (mg/L)                               | 1.15            | 1.0             | 1.55                          | 1.43                          |
| Geomean [95% CI]                         | [0.9 – 1.5]     | [0.8 – 1.2]     | [1.2 – 2.0]                   | [1.0 – 1.9]                   |
| DHEAs (µmol/L)                           | 3.9             | 3.7             | <b>2.4</b> <sup>****b</sup>   | <b>2.1</b> <sup>***a</sup>    |
| Geomean [95% CI]                         | [3.4 – 4.5]     | [3.2 – 4.3]     | <b>[2.0 – 2.8]</b>            | <b>[1.8 – 2.4]</b>            |
| Rheumatoid Factor (IU/ml)                | 4.0             | 3.6             | 3.4                           | 2.9 <sup>*a</sup>             |
| Geomean [95% CI]                         | [3.3 – 4.8]     | [3.1 – 4.2]     | [2.7 – 4.1]                   | [2.7 – 4.1]                   |
| Reactive Oxygen Metabolites (IU/L)       | 333.4           | 333.8           | <b>390.1</b> <sup>****b</sup> | <b>398.1</b> <sup>****a</sup> |
| Geomean [95% CI]                         | [317.3 – 350.4] | [321.3 – 346.9] | <b>[373.1 – 407.9]</b>        | <b>[382.3 – 414.5]</b>        |

**Supplementary Table 2. Linear regression analysis for the absolute numbers of immune cells**

Linear (Enter) regression method is used. Variables: CMV status (0= seronegative, 1= seropositive), Gender (0=female, 1= male), Gender\* CMV status, and Age (years). All data are log-transformed.

\*p<0.05. Bold numbers indicate significant differences within one subset. After a multiple testing correction only values with p<0.0014 are considered significant. Significant differences after correction are underlined.

| Cell subset     | Predicting variable | p-value       | $\beta$ coefficient | R <sup>2</sup> model |
|-----------------|---------------------|---------------|---------------------|----------------------|
| T cell          | CMV status          | 0.928         | -0.008              | 0.108                |
|                 | <b>Gender</b>       | <b>0.016*</b> | <b>-0.209</b>       |                      |
|                 | Gender*CMV          | 0.124         | -0.162              |                      |
|                 | Age                 | 0.422         | 0.049               |                      |
| CD4 TemRO early | CMV status          | 0.873         | -0.015              | 0.030                |
|                 | Gender              | 0.666         | 0.039               |                      |
|                 | Gender*CMV          | 0.099         | -0.181              |                      |
|                 | Age                 | 0.905         | 0.008               |                      |
| CD4 TemRO int   | CMV status          | 0.325         | 0.094               | 0.010                |
|                 | Gender              | 0.707         | 0.034               |                      |
|                 | Gender*CMV          | 0.189         | -0.145              |                      |
|                 | Age                 | 0.929         | -0.006              |                      |
| CD4 TemRA early | CMV status          | 0.474         | -0.066              | 0.059                |
|                 | <b>Gender</b>       | <b>0.021*</b> | <b>-0.205</b>       |                      |
|                 | Gender*CMV          | 0.692         | -0.043              |                      |
|                 | Age                 | 0.478         | 0.044               |                      |
| CD4 TemRA int   | CMV status          | 0.967         | -0.004              | 0.035                |
|                 | <b>Gender</b>       | <b>0.015*</b> | <b>-0.219</b>       |                      |
|                 | Gender*CMV          | 0.244         | 0.127               |                      |
|                 | Age                 | 0.989         | -0.001              |                      |
| CD8 TemRO early | CMV status          | 0.876         | -0.015              | 0.030                |
|                 | Gender              | 0.661         | 0.039               |                      |
|                 | Gender*CMV          | 0.098         | -0.181              |                      |
|                 | Age                 | 0.905         | 0.008               |                      |
| CD8 TemRO int   | CMV status          | 0.326         | 0.094               | 0.010                |
|                 | Gender              | 0.707         | 0.034               |                      |
|                 | Gender*CMV          | 0.189         | -0.145              |                      |
|                 | Age                 | 0.929         | -0.006              |                      |
| CD8 TemRA early | CMV status          | 0.558         | -0.055              | 0.030                |
|                 | Gender              | 0.356         | 0.083               |                      |
|                 | Gender*CMV          | 0.170         | -0.150              |                      |
|                 | Age                 | 0.915         | 0.007               |                      |
| CD8 TemRA int   | CMV status          | 0.967         | -0.004              | 0.035                |
|                 | <b>Gender</b>       | <b>0.015*</b> | <b>-0.219</b>       |                      |
|                 | Gender*CMV          | 0.244         | 0.127               |                      |
|                 | Age                 | 0.989         | -0.001              |                      |
| CD8/CD4 ratio   | CMV status          | 0.181         | -0.122              | 0.090                |
|                 | Gender              | 0.936         | 0.007               |                      |
|                 | Gender*CMV          | 0.061         | -0.199              |                      |
|                 | Age                 | 0.101         | 0.100               |                      |
| Treg            | CMV status          | 0.519         | -0.059              | 0.076                |

|                                 |                   |               |               |       |
|---------------------------------|-------------------|---------------|---------------|-------|
| CD4+CD45RA+ CD25 <sup>dim</sup> | Gender            | 0.143         | -0.129        |       |
|                                 | Gender*CMV        | 0.141         | -0.157        |       |
|                                 | Age               | 0.486         | 0.043         |       |
|                                 | CMV status        | 0.301         | -0.096        | 0.070 |
| naive Treg                      | Gender            | 0.060         | -0.166        |       |
|                                 | Gender*CMV        | 0.472         | -0.077        |       |
|                                 | Age               | 0.120         | 0.097         |       |
|                                 | CMV status        | 0.245         | -0.108        | 0.060 |
| memory Treg                     | <b>Gender</b>     | <b>0.006*</b> | <b>-0.245</b> |       |
|                                 | Gender*CMV        | 0.852         | 0.020         |       |
|                                 | Age               | 0.701         | -0.024        |       |
|                                 | CMV status        | 0.084         | -0.162        | 0.049 |
| B cell                          | Gender            | 0.913         | -0.010        |       |
|                                 | Gender*CMV        | 0.490         | -0.075        |       |
|                                 | Age               | 0.349         | 0.059         |       |
|                                 | CMV status        | 0.778         | -0.027        | 0.032 |
| transitional                    | Gender            | 0.256         | -0.102        |       |
|                                 | Gender*CMV        | 0.419         | -0.088        |       |
|                                 | Age               | 0.411         | 0.052         |       |
|                                 | <b>CMV status</b> | <b>0.040*</b> | <b>-0.194</b> | 0.038 |
| naive mature                    | <b>Gender</b>     | <b>0.024*</b> | <b>-0.203</b> |       |
|                                 | Gender*CMV        | 0.366         | 0.098         |       |
|                                 | Age               | 0.932         | -0.005        |       |
|                                 | CMV status        | 0.355         | -0.088        | 0.021 |
| natural effector                | Gender            | 0.203         | -0.115        |       |
|                                 | Gender*CMV        | 0.985         | -0.002        |       |
|                                 | Age               | 0.403         | 0.053         |       |
|                                 | CMV status        | 0.116         | 0.149         | 0.020 |
| CD27- memory                    | Gender            | 0.801         | 0.023         |       |
|                                 | Gender*CMV        | 0.136         | -0.164        |       |
|                                 | Age               | 0.373         | -0.057        |       |
|                                 | CMV status        | 0.799         | -0.024        | 0.054 |
| CD27+ memory                    | Gender            | 0.088         | -0.152        |       |
|                                 | Gender*CMV        | 0.508         | -0.072        |       |
|                                 | Age               | 0.057         | 0.119         |       |
|                                 | CMV status        | 0.126         | 0.143         | 0.049 |
|                                 | Gender            | 0.370         | -0.080        |       |
|                                 | Gender*CMV        | 0.120         | -0.169        |       |
|                                 | Age               | 0.238         | 0.074         |       |
